# Supplementary material for: The lncRNA Punisher Regulates Apoptosis and Mitochondrial Homeostasis of Vascular Smooth Muscle Cells via Targeting miR‐664a‐5p and OPA1
Source: Hindawi journal article supplement (doi:10.1155/2022/5477024), 2022-01-01
Supplement: f1 [file 5477024.f1.pdf]

## **Supplemental information**

### **The lncRNA Punisher regulates apoptosis and mitochondrial homeostasis of vascular smooth muscle cells via targeting miR-664a-5p and OPA1**

Yanyan Yang, Min Li, Yan Liu, Zhibin Wang, Xiuxiu Fu, Xingqiang He, Qi Wang,  
Xiao-xin Li, Huibo Ma, Kun Wang, Lu Zou, Jian-xun Wang, Tao Yu

## SUPPLEMENTAL FIGURES

Figure S1

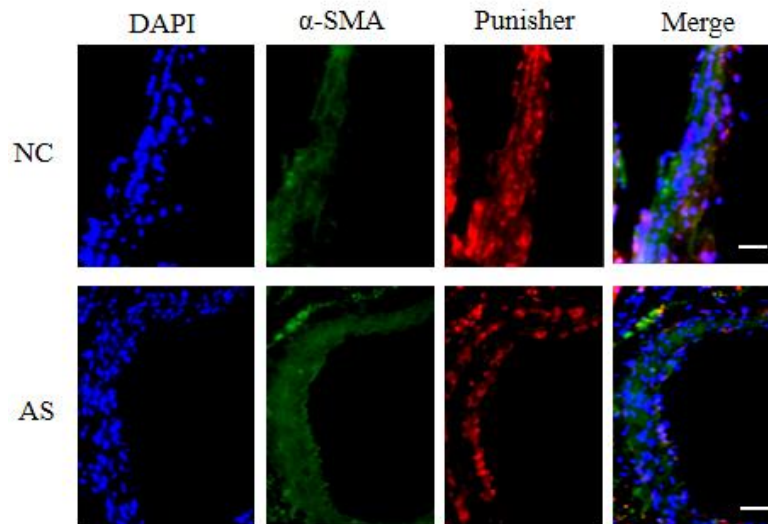

**Figure S1. Evaluation of Punisher expression in situ in the vessels of patients.** Immunofluorescent staining was used to detect media of aortas ( $\alpha$ -SMA) and Punisher expression. Nuclei were stained with DAPI (blue). Scale bars: 20  $\mu$ m.

**Figure S2**

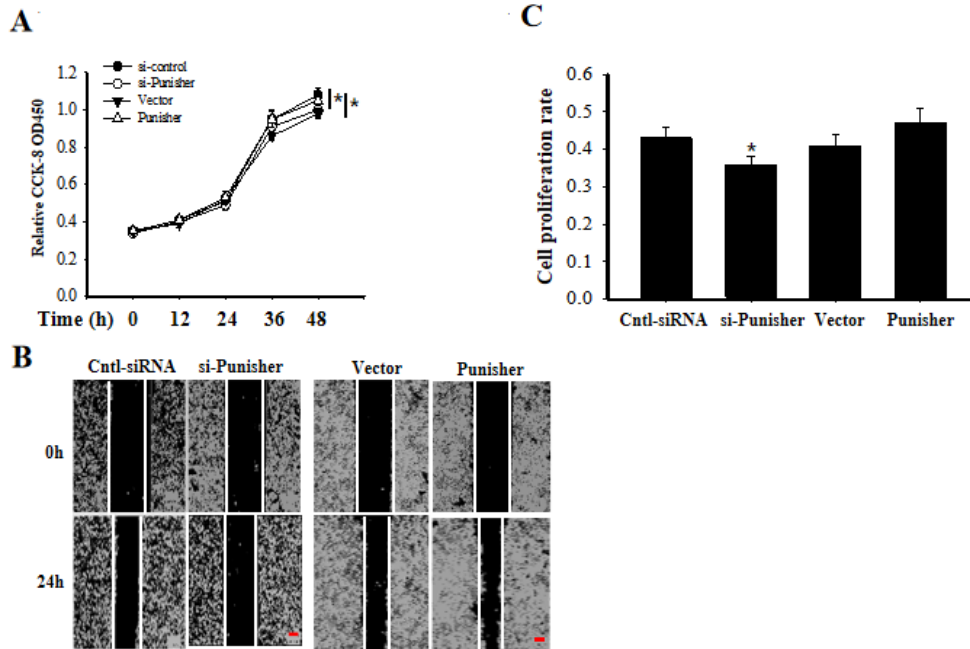

**Figure S2. Punisher partially regulates cell proliferation and migration of VSMCs.** (A) CCK-8 assay in VSMC transfected with cntl-siRNA, Punisher siRNA, Vector and Punisher, respectively. (B) Evaluation of cell migration via wound healing assay after transfection of cntl-siRNA, Punisher siRNA, Vector and Punisher. (C). The cell proliferation rate was analyzed by the Image J software, version 1.8.0 (NIH, Bethesda, MD, USA). All values are the average of at least 3 biological replicates, and data shown are the mean $\pm$ SD. Scale bars: 20  $\mu$ m. \*P<0.05; \*\*P<0.01.

**Figure S3**

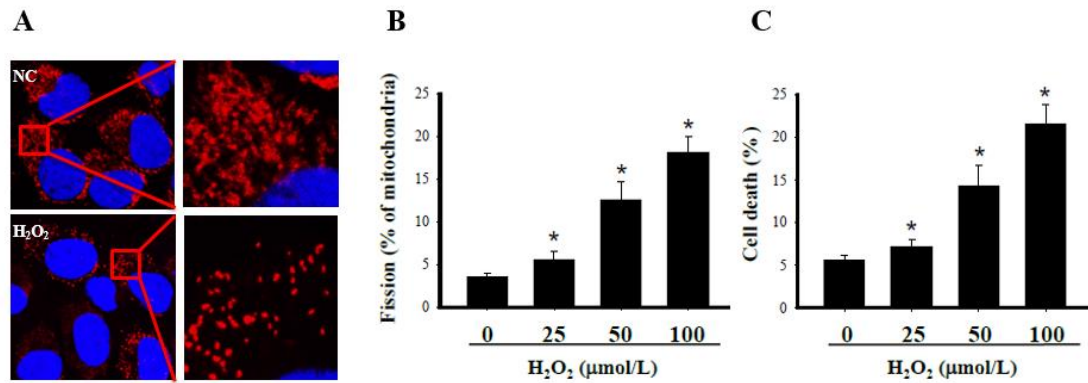

**Figure S3. VSMC cells can be induced apoptosis and mitochondrial fission upon H<sub>2</sub>O<sub>2</sub> treatment.** (A) Mitotracker staining of mitochondrial fission in VSMC after 100 μM H<sub>2</sub>O<sub>2</sub> stimulation with 8 hours. (B) Cell number with mitochondrial fission and fission ratio was calculated rate. (C) Cell death was detected with MTT assay after 100 μM H<sub>2</sub>O<sub>2</sub> stimulation with different times. All values are the average of at least 3 biological replicates, and data shown are the mean ±SD. \*P<0.05.

**Figure S4**

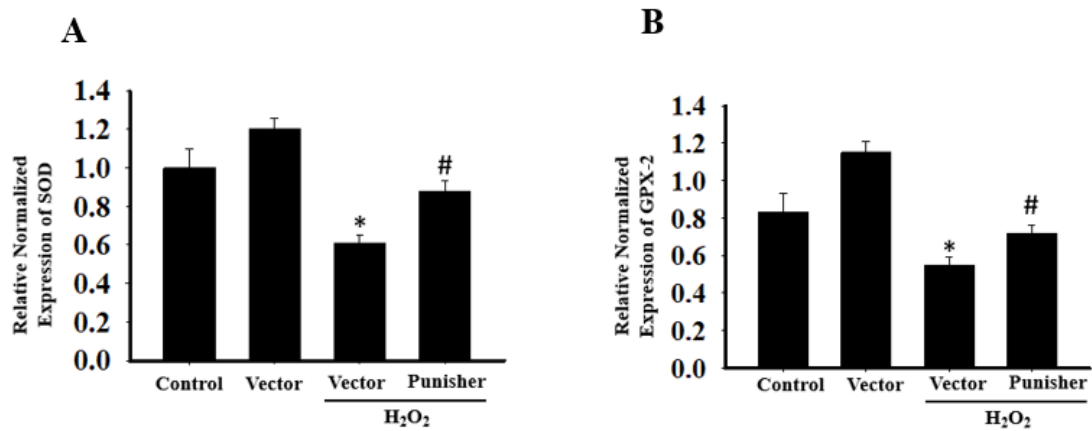

**Supplementary Fig. 4. Punisher can regulate antioxidant enzymes.** (A) Punisher and netative vector were transfected in VSMC, and mRNA level of SOD was detected by qRT-PCR after 100 mM H<sub>2</sub>O<sub>2</sub> stimulation with 24 hours. (B) GPX2 expression was detected via qRT-PCR after 100 mM H<sub>2</sub>O<sub>2</sub> stimulation with 24 hours. All values are the average of at least 3 biological replicates, and data shown are the mean  $\pm$ SD. #, is compared with the vector treated with H<sub>2</sub>O<sub>2</sub> group, #P < 0.05; \*, is compared with the vector group, \*P < 0.05.

**Figure S5**

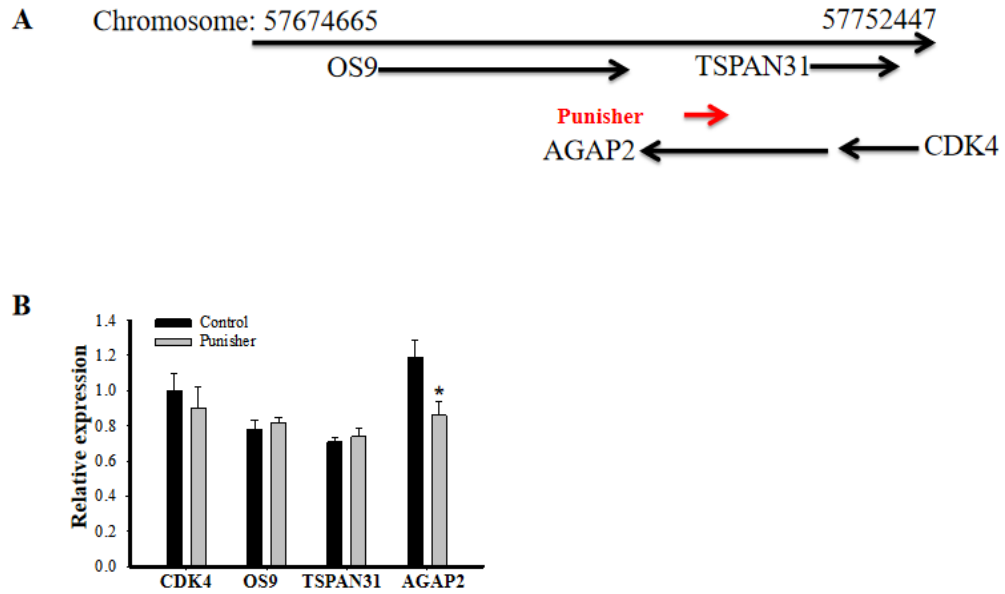

**Figure S5. Punisher expression has no relationship with its nearby coding genes.** (A) Punisher location in chromosome and (B) expression level of nearby genes after transfection of si-Punisher in VSMCs. Data are shown as mean  $\pm$  s.e.m. of three independent experiments. \* $P < 0.05$ .

**Figure S6**

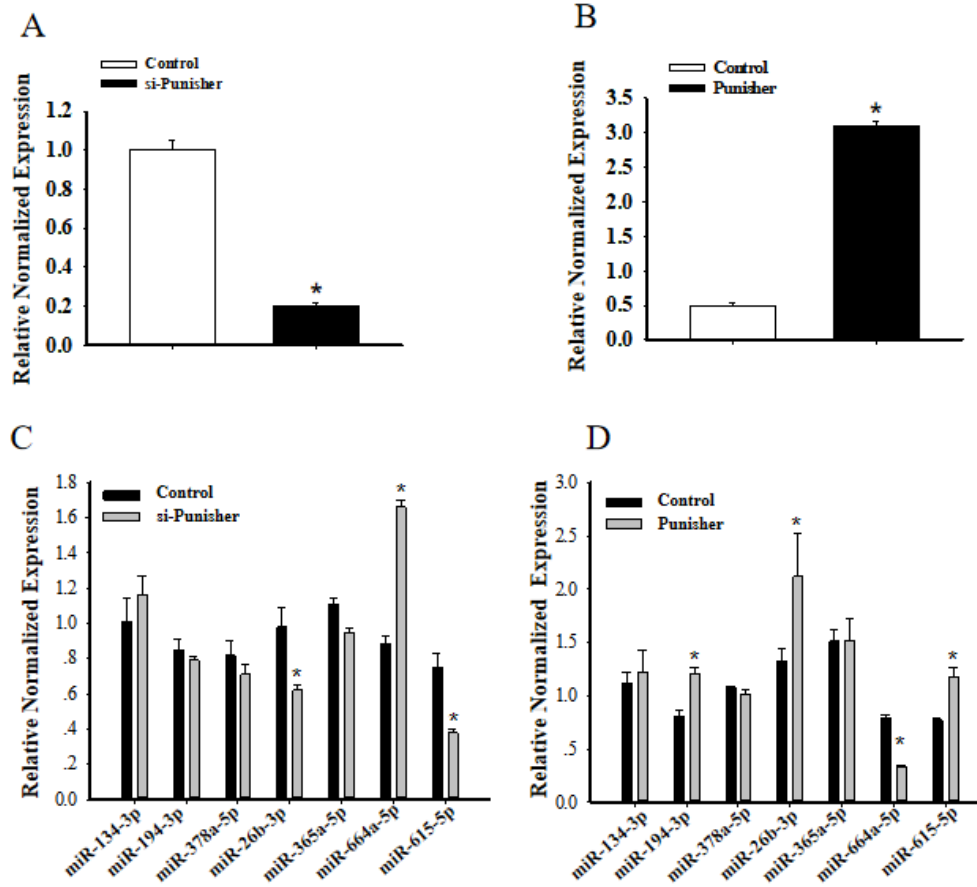

**Figure S6. The regulatory effect of Punisher to predicted downstream miRNAs.** (A, B) The validation of transfection efficiency of siRNA and overexpression of Punisher in VSMCs. (C, D) The regulatory effect of Punisher to predicted miRNAs. Data are shown as mean  $\pm$  s.e.m. of three independent experiments. \*P < 0.05.

## SUPPLEMENTAL TABLES

**Table S1. Baseline characteristics of the CAD patients receiving CABG surgery and healthy subjects.**

| Clinical parameters       | Healthy (n = 9) | Disease (n = 12) |
|---------------------------|-----------------|------------------|
| Age (yr)                  | 56.14±8.139     | 61.73±6.018      |
| Men                       | 9(59.3)         | 7(54.8)          |
| BMI (kg/m <sup>2</sup> )  | 22.561±5.1783   | 23.323±2.8496    |
| Systolic BP (mmHg)        | 122.56±17.134   | 141.92±24.267    |
| Diastolic BP (mmHg)       | 73.24±11.192    | 85.54±15.961     |
| Total cholesterol(mmol/L) | 3.65 ±1.11      | 4.6315 ±1.291    |
| HDL cholesterol (mmol/L)  | 1.36±0.52       | 1.2196±0.337     |
| LDL cholesterol (mmol/L)  | 1.7429±1.1013   | 2.8462±1.0159    |
| Triglycerides (mmol/L)    | 1.20±0.652      | 1.6835±0.9202    |
| FBG (mmol/L)              | 4.14±1.5623     | 5.5180±1.8774    |
| Smoking(%)                | 4(12.5)         | 8(45.1)          |
| Diabetes mellitus (%)     | 0(0)            | 5(22.6)          |
| Hypertension (%)          | 0(0)            | 9(51.6)          |



**Table S2. PCR primers used in this study**

| Primer name       | Sequence (5' to 3')       |
|-------------------|---------------------------|
| Punisher-F        | CCGGAATTCAGCGCCTAAGGAGC   |
| Punisher-R        | CCGCTCGAGTTAAAATCCTTTGGT  |
| has-miR-664a-5p-F | ACTGGCTAGGGAAAATGATTGG    |
| has-miR-378a-5p-F | CTCCTGACTCCAGGTCCTGT      |
| has-miR-365a-5p-F | AGGGACTTTTGGGGGCAGAT      |
| has-miR-194-3p-F  | CCAGTGGGGCTGCTGTTATCTG    |
| has-miR-26b-3p-F  | CCTGTTCTCCACTTGGCTC       |
| has-miR-615-5p-F  | GTCCCCGGTGCTCGGATC        |
| has-miR-134-3p-F  | CCTGTGGGCCACCTAGTCA       |
| OPA1-F            | CCACAGAGAAAGTTAGAGAAATTC  |
| OPA1-R            | TTGATAGACTATAGGCAAGAAGAA  |
| AGAP2-F           | CAGCCTTTTTGCGAATCGTCG     |
| AGAP2-R           | TGCCGTGGGTACTGTGGAT       |
| OS9-F             | CTGTCCAGTTTGTAGGACTGC     |
| OS9-R             | GATCCATAACGCATCTCACTC     |
| TSPAN31-F         | CTGCTCCAAGAATGCGCTTTG     |
| TSPAN31-R         | CAATGACTCCGCCGATGATGT     |
| CDK4-F            | AGCTGGTCACATGGTGAGG       |
| CDK4-R            | CCATAGGCACCGACACCAAT      |
| FIS1-F            | CAAGGAACTGGAGCGGCTCATT    |
| FIS1-R            | GGACACAGCAAGTCCGATGAGT    |
| SOD2-F            | CCCAGATAGCTCTTCAGCCTGCACT |
| SOD2-R            | TAAGCGTGCTCCCACACATCAATCC |
| GPX2-F            | ATTTGGACATCAGGAGAACTGT    |
| GPX2-R            | CTTCAGGTAGGCGAAGACA       |
| GAPDH-F           | GTCTCCTCTGACTTCAACAGCG    |
| GAPDH-R           | ACCACCCTGTTGCTGTAGCCAA    |
| $\beta$ -Actin-F  | CACCATTGGCAATGAGCGGTTC    |
| $\beta$ -Actin-R  | AGGTCTTTGCGGATGTCCACGT    |
| U6-F              | CTCGCTTCGGCAGCACA         |

---

U6-R

AACGCTTCACGAATTTGCGT

---
